# Supplementary material for: Competitive adsorption of naphthalene and phenanthrene on walnut shell based activated carbon and the verification via theoretical calculation
Source: Royal Society of Chemistry journal article supplement (doi:10.1039/c9ra09447d), 2020-01-01
Supplement: c9ra09447d1.pdf [file c9ra09447d1.pdf]

1

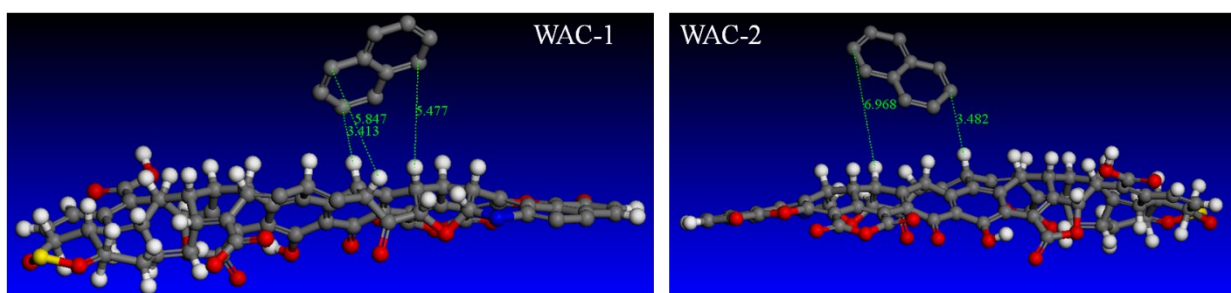

2

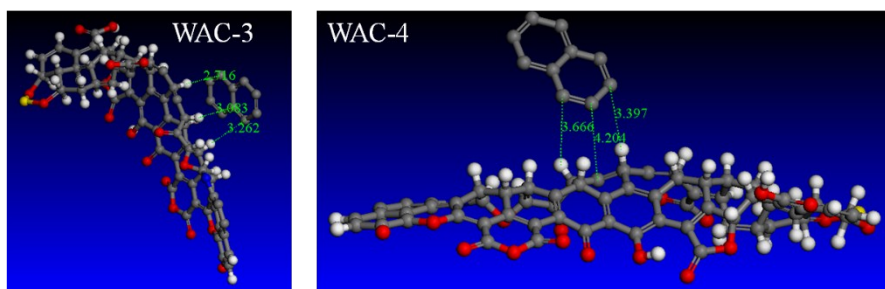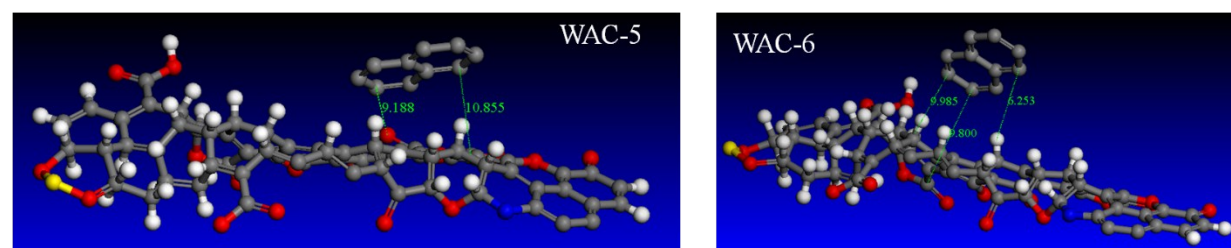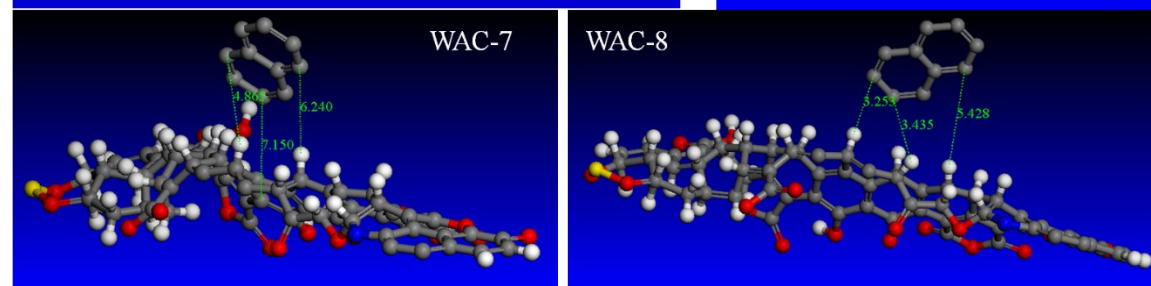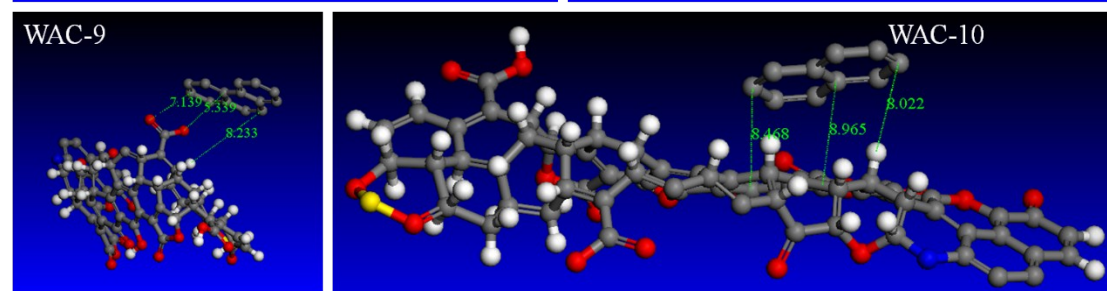

3

4

Fig. S1 Optimized geometrical structures and the adsorption processes of NAP on WAC.

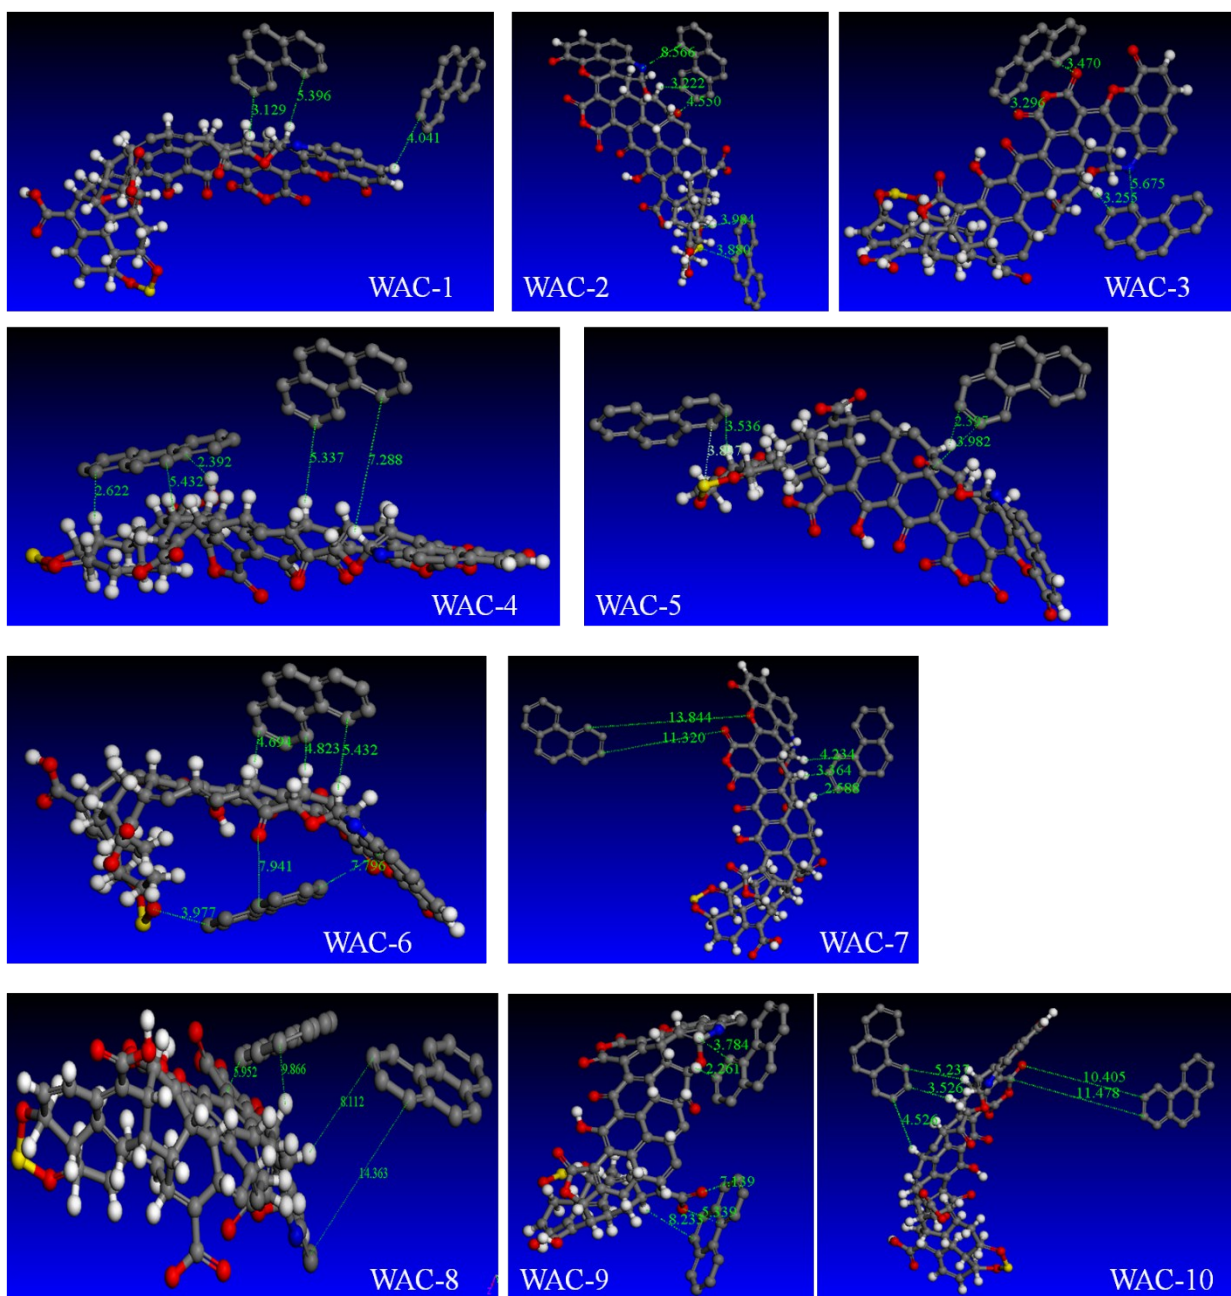

Fig. S2 Optimized geometrical structures and the adsorption processes of PHE on WAC

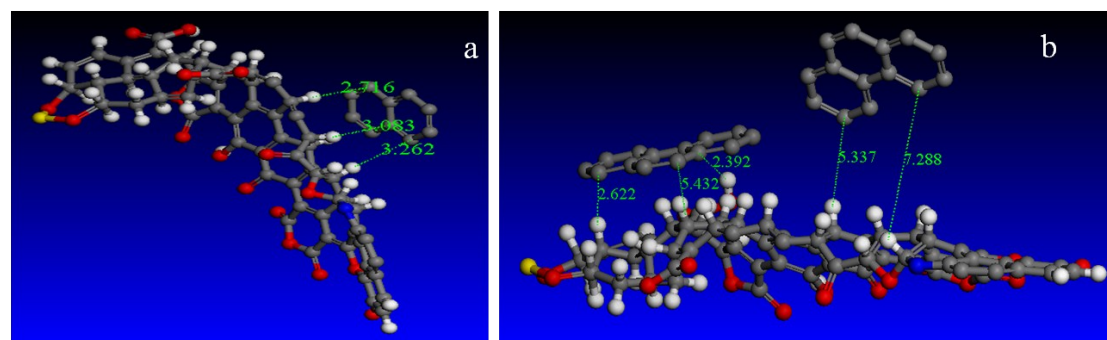

Fig. S3 Optimized geometrical structures and the adsorption processes of NAP (a) and PHE (b) on WAC.
